# Supplementary material for: High-entropy alloy nanocrystal assembled by nanosheets with d–d electron interaction for hydrogen evolution reaction
Source: Royal Society of Chemistry journal article supplement (doi:10.1039/d3ee01929b), 2023-01-01
Supplement: d3ee01929b1.pdf [file d3ee01929b1.pdf]

## Supporting Information

### **High-Entropy Alloy Nanocrystal Assembled by Nanosheets with d-d Electron Interaction for Superior Hydrogen Evolution Reaction**

Min Wei<sup>a</sup>, Yuyan Sun<sup>a</sup>, Junyu Zhang<sup>a</sup>, Fei Ai<sup>a</sup>, Shibo Xi<sup>\*b</sup>, Jike Wang<sup>\*a</sup>

\* Corresponding authors

<sup>a</sup> The Institute for Advanced Studies, Wuhan University, Wuhan, 430072, China.

Email: Jike.Wang@whu.edu.cn

<sup>b</sup> Institute of Chemical and Engineering sciences, A\*STAR (Agency for Science, Technology and Research) Singapore 627833, Singapore.

Email: xi\_shibo@partner.nus.edu.sg

## 1. Materials

Nickel acetylacetonate ( $\text{Ni}(\text{acac})_2$ ), Platinum acetylacetonate ( $\text{Pt}(\text{acac})_2$ ), Palladium acetylacetonate ( $\text{Pd}(\text{acac})_2$ ), Rhodium acetylacetonate ( $\text{Rh}(\text{acac})_3$ ), Molybdenum hexacarbonyl ( $\text{Mo}(\text{CO})_6$ ), Triethylene glycol (TEG), D(+)-Glucose, Triethylbenzylammonium (TEBA) are purchased by Aladdin.

### 1.1. Preparation of PtMoPdRhNi nanocrystals (PtMoPdRhNi NCs)

PtMoPdRhNi NCs were prepared by traditional one-step wet chemistry method. 0.025/0.075/0.125/0.175 mmol  $\text{Ni}(\text{acac})_2$ , 0.025 mmol  $\text{Pt}(\text{acac})_2$ , 0.025 mmol  $\text{Pd}(\text{acac})_2$ , 0.025 mmol  $\text{Rh}(\text{acac})_3$ , 0.125 mmol  $\text{Mo}(\text{CO})_6$ , 600 mg TEBA were dissolved in 10 mL TEG under stirring for 4 hours. Then the mixed reacted in reaction still at 230 °C for 1 h, and then cooled down until room temperature. After that, the productions were washed with anhydrous ethanol several times, dried in vacuum for further used.

### 1.2. Preparation of PtMoPdRhNi nanoparticles (PtMoPdRhNi NPs)

PtMoPdRhNi NCs were prepared by traditional one-step wet chemistry method. 0.025 mmol  $\text{Ni}(\text{acac})_2$ , 0.025 mmol  $\text{Pt}(\text{acac})_2$ , 0.025 mmol  $\text{Pd}(\text{acac})_2$ , 0.025 mmol  $\text{Rh}(\text{acac})_3$  and 0.025 mmol  $\text{Mo}(\text{acac})_2$  were dissolved in 10 mL TEG under stirring for 4 hours. Then the mixed reacted in reaction still at 230 °C for 1 h, and then cooled down until room temperature. After that, the productions were washed with anhydrous ethanol several times, dried in vacuum for further used.

## 2. Materials characterization

Transmission electron microscopy (TEM) images and elemental distribution spectrometer (EDS) mapping were captured using a JEM-ARM200F (JEOL, JAPAN) at 200 kV. The crystal structure and lattice parameters of PtMoPdRhNi NCs and Commercial Pt/C were characterized by X-ray powder diffraction (XRD, Rigaku Smartlab SE, Japan) which

was operated with Cu K $\alpha$  radiation ( $k = 1.5405 \text{ \AA}$ ) at 40 kV and 30 mA. The chemical state of PtMoPdRhNi NCs and commercial Pt/C were acquired through X-ray photoelectron spectroscopy (XPS ESCALAB 250XI) with an ESCALAB 250 Xi (Thermo Fisher Scientific, USA) using a monochromatic Al X-ray source. The content of Pt, Ni, Mo, Pd, Rh in catalyst is analyzed via the inductively coupled plasma-atomic emission spectroscopy (ICP-AES, Thermo Fisher Scientific, USA).

### **3. XAFS experiment and data processing**

XAFS measurements at Pt L<sub>3</sub>-edge and Ni K-edge in transmission mode was performed at the Singapore synchrotron light source (SSLS).

The raw data analysis was conducted using IFEFFIT software package according to the standard data analysis procedures. The spectra were calibrated, averaged, pre-edge background subtracted, and post-edge normalized using Athena program in IFEFFIT software package. The Fourier transformation of the  $k^3$ -weighted EXAFS oscillations,  $k^3 \cdot \chi(k)$ , from  $k$  space to  $R$  space was performed over a range of 3.5-11.5  $\text{\AA}^{-1}$  to obtain a radial distribution function. And data fitting was done by Artemis program in IFEFFIT<sup>1</sup>.

### **4. Electrochemical test**

The electrochemical activity of PtMoPdRhNi NCs for HER was measured in a three-electrode electrolytic cell using biopotentiostat (Pine, USA) equipped with a rotational disk electrode (RDE) system, in which a glassy carbon electrode covered with a thin film of catalyst was used as the working electrode, a reversible hydrogen electrode (RHE) and a graphite rod electrode were employed as the reference electrode and counter electrode, respectively. To evaluate the HER performance, PtMoPdRhNi NCs catalysts were mixed with Vulcan XC-72 carbon black (mass ratio is 1:1). 3.0 mg of the catalyst was dispersed in 2 ml of solution (1.5 ml of water, 0.48 ml of ethyl alcohol and 0.02 ml of 5 wt% Nafion). The electrodes had a

metal (HEAs or Pt) loading of  $21.44 \text{ mg cm}^{-2}$ . The hydrogen linear sweep voltammetry (LSV) was recorded in  $\text{N}_2$ -saturated  $1.0 \text{ M KOH}$  solution at a scan rate of  $10 \text{ mV s}^{-1}$ . The electrochemically active surface area (ECSA) of catalysts were reflected by electrochemical double-layer capacitance,  $C_{dl}$ , which was calculated from CV curves recorded in a potential range without Faradaic current at different scan rates from  $20$  to  $100 \text{ mV s}^{-1}$ . The anodic charging currents measured at desired potential vs. RHE was plotted as a function of the scan rate and from the slope,  $C_{dl}$  was obtained. The accelerated durability tests (ADTs) were conducted in  $1.0 \text{ M KOH}$  solution through performing cyclic potential sweeps between  $0$  and  $-0.5 \text{ V}$  vs. RHE at a scan rate of  $100 \text{ mV s}^{-1}$  for  $50,000$  cycles.

The  $\text{H}_2$  product was measured by H-type electrolytic cell with three-electrode system. In order to accurately determine the actual amount of hydrogen generation, a systematic experiment was conducted by a closed HER device. Before experiment, the electrolyte was bubbled with Ar for at least  $30 \text{ min}$ . Then, the experiment was carried out. The product was taken every  $11 \text{ min}$  and  $\text{H}_2$  yield was measured precisely gas chromatography (GC) instrument. The Faradaic efficiency of catalysts is defined as the ratio of the amount of experimentally determined  $\text{H}_2$  to that of the theoretically expected  $\text{H}_2$  from the reaction. As for the theoretical value, it was assumed that  $100\%$  current efficiency occurs during the reaction, which means only the HER process was occurring at the working electrode. The theoretical amount of  $\text{H}_2$  evolved was then calculated by applying the Faraday law, which states that the passage of  $96485.4 \text{ C}$  charge causes  $1$  equivalent of reaction<sup>2,3</sup>.

In-situ surface-enhanced Raman spectroscopy (SERS) was performed with Renishaw (Confocal Raman Microscopy). The excitation wavelength was  $633 \text{ nm}$  from a He-Ne laser for  $400\text{-}1500 \text{ cm}^{-1}$  detection and  $532 \text{ nm}$  from a He-Ne laser for  $1600\text{-}2100 \text{ cm}^{-1}$  detection, and a  $50\times$  microscope for all Raman measurements.

## 5. DFT calculation details

Density-functional theory (DFT) containing spin polarization was implemented in the Vienna *ab-initio* simulation package (VASP)<sup>4,5</sup>. The core-electron interactions were described by the projector-augmented wave (PAW) method<sup>6</sup>. And the exchange-correlation interaction was represented by Generalized gradient approximation with Perdew, Bruke and Ernzerhof (PAW-PBE)<sup>7</sup>. The plane wave function with a cutoff energy of 600 eV and 500 eV was used for bulk geometry and slab optimizations, respectively. The method of special quasirandom structure (SQS) was utilized for approximating the PtMoPdRhNi HEA, as SQS represent the best periodic approximation to the true disordered state<sup>8</sup>. It was generated from Pt<sub>30</sub>Mo<sub>5</sub>Pd<sub>25</sub>Rh<sub>25</sub>Ni<sub>15</sub> (1 1 1) surface by using Alloy Theoretic Automated Toolkit (ATAT)<sup>9</sup> code optimized by VASP. Fcc structure of metallic Pt (PDF#89-7382) was used as bulk model. A vacuum thickness of 15 Å was added to perpendicular the surface to avoid the image force between the periodic slab. The convergence criterion of energy and force were set to 1x10<sup>-5</sup> eV and -0.02 eV·Å<sup>-1</sup> in all calculation process, respectively. A k-points sampling 2x2x1 and 1x2x1 based on Gamma-centred Monkhorst-Pack were conducted for Pt (1 1 1) and PtMoPdRhNi bulk geometry calculation and slab structure relaxations. A four-layer slab model with supercell was built by cleave the (1 1 1) facet of metallic Pt and Pt<sub>30</sub>Mo<sub>5</sub>Pd<sub>25</sub>Rh<sub>25</sub>Ni<sub>15</sub>, and the total number of atoms in Pt and Pt<sub>30</sub>Mo<sub>5</sub>Pd<sub>25</sub>Rh<sub>25</sub>Ni<sub>15</sub> are 120 and 160, respectively.

The adsorption energy was calculated according to formula  $\Delta E_{\text{ads}}(\text{H}^*) = E_{\text{slab}+\text{H}(\text{H}^*)} - E_{\text{slab}} - 1/2E(\text{H}_2)$  and  $\Delta E_{\text{ads}}(\text{H}_2\text{O}) = E_{\text{slab}+\text{H}_2\text{O}(\text{H}_2\text{O})} - E_{\text{slab}} - 1/2E(\text{H}_2\text{O})$ , where  $E_{\text{slab}+\text{O}(\text{H}^*)}$ ,  $E_{\text{slab}}$ ,  $E(\text{H}_2)$ ,  $E_{\text{slab}+\text{H}_2\text{O}(\text{H}_2\text{O})}$  and  $E(\text{H}_2\text{O})$  were represented the total energy of H adsorption on slab, the total energy of pure slab, the total energy of the hydrogen molecules in gas phase, the total energy of H<sub>2</sub>O adsorption on slab and the total energy of H<sub>2</sub>O molecules, respectively. And the Gibbs

free energy of intermediate at 300 K and 1atm was calculated by  $\Delta G = \Delta E + \Delta ZPE - T\Delta S$ , where  $\Delta E_{\text{abs}}$ ,  $\Delta ZPE$ ,  $\Delta S$  is adsorption energy, zero-point energy change and entropy change of adsorption of intermediates, respectively.

Based on Sabatier volcano, the equation 
$$A = \sum_{i=1}^Z \left( \prod_{k=1}^{\text{metals}} f_k^{n_{ik}} \right) * \exp\left(-\frac{|\Delta G_i - \Delta G_{\text{opt}}|}{k_B T}\right)$$
 is applied to calculate the activity (A) of H\* adsorption/desorption with different configuration in Pt<sub>30</sub>Mo<sub>5</sub>Pd<sub>25</sub>Rh<sub>25</sub>Ni<sub>15</sub>, in which Z is the total number of surface configurations,  $f_k$  is the atomic fraction of element k,  $n_{ik}$  is the number of element k in the surface configuration i,  $\Delta G_i$  is the modeled adsorption free energy for the *i*th surface configuration,  $\Delta G_{\text{opt}}$  is the optimum adsorption free energy according to the Sabatier principle,  $k_B$  is Boltzmann's constant, and T is the absolute temperature<sup>10</sup>. The M-H bond length appears to be a good measure of M-H bond strength, and thus a great measure for  $\Delta G_{\text{H}}$ <sup>11</sup>. Therefore, the contribution of constitute metals to the activity was estimated approximately, in which on-top adsorption configuration assumed the contribution of the nearest neighbor atom accounted for 100%, and hexagonal close packed configuration was weighted according to the reciprocal distance.

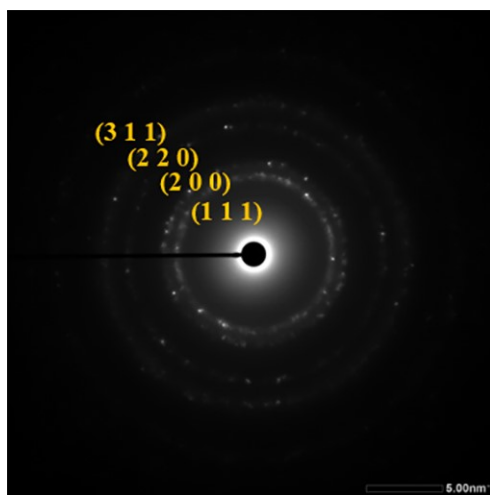

**Figure S1.** Selected area electron diffraction (SAED) image of  $\text{Pt}_{28}\text{Mo}_6\text{Pd}_{28}\text{Rh}_{27}\text{Ni}_{15}$  NCs.

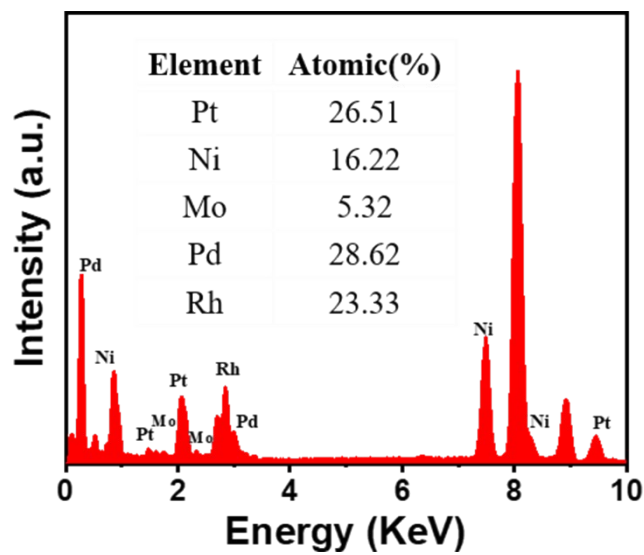

**Figure S2.** EDS spectrum and the corresponding atomic ratio of  $\text{Pt}_{28}\text{Mo}_6\text{Pd}_{28}\text{Rh}_{27}\text{Ni}_{15}$  NCs.



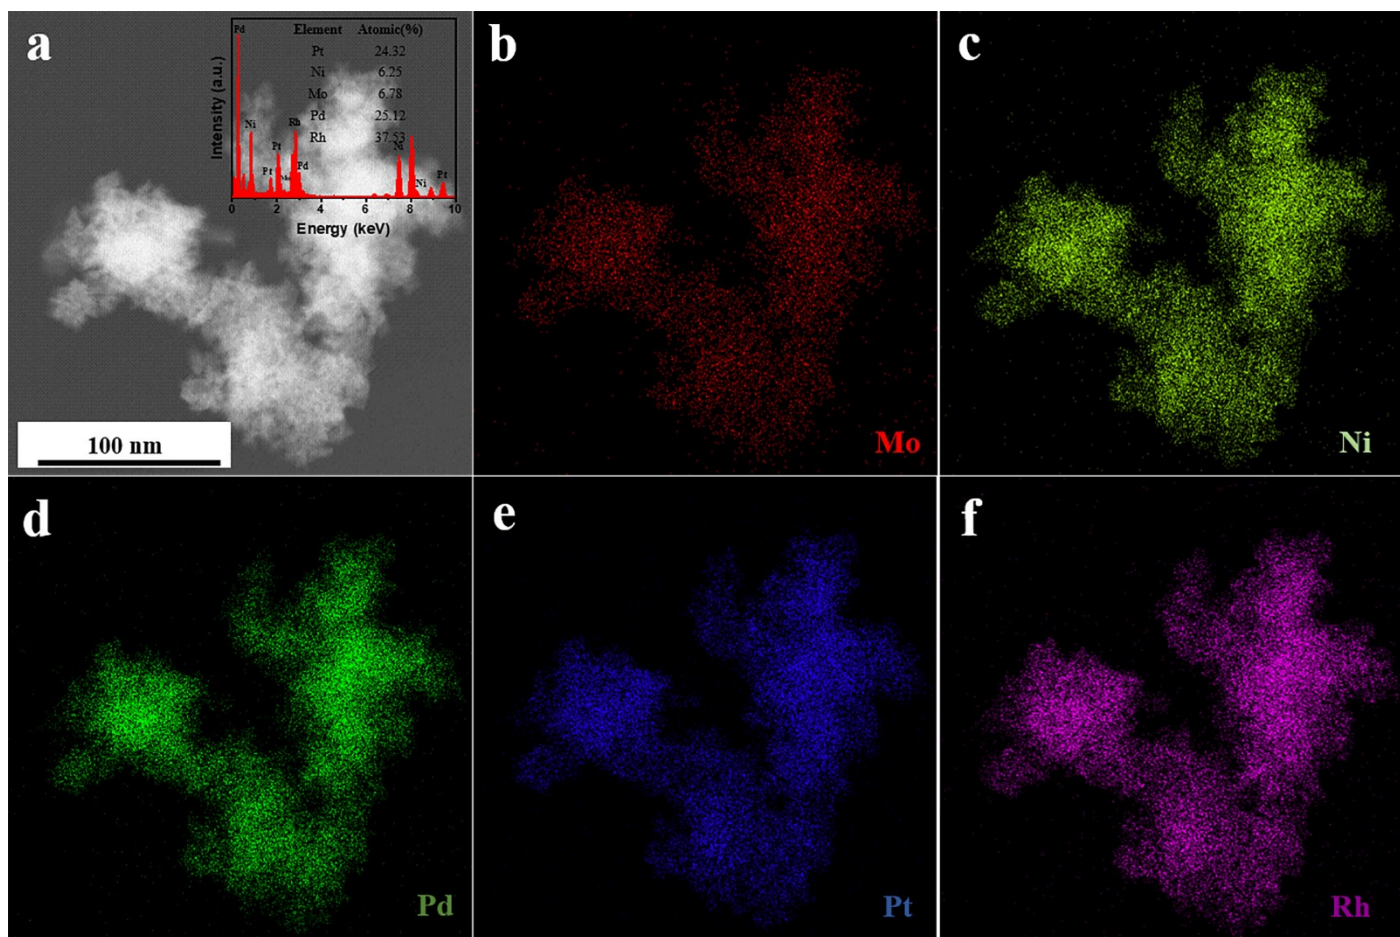

**Figure S3.** (a) EDS spectrum and the corresponding atomic ratio, (b-f) elemental mapping of Pt<sub>23</sub>Mo<sub>6</sub>Pd<sub>23</sub>Rh<sub>43</sub>Ni<sub>5</sub> NCs.

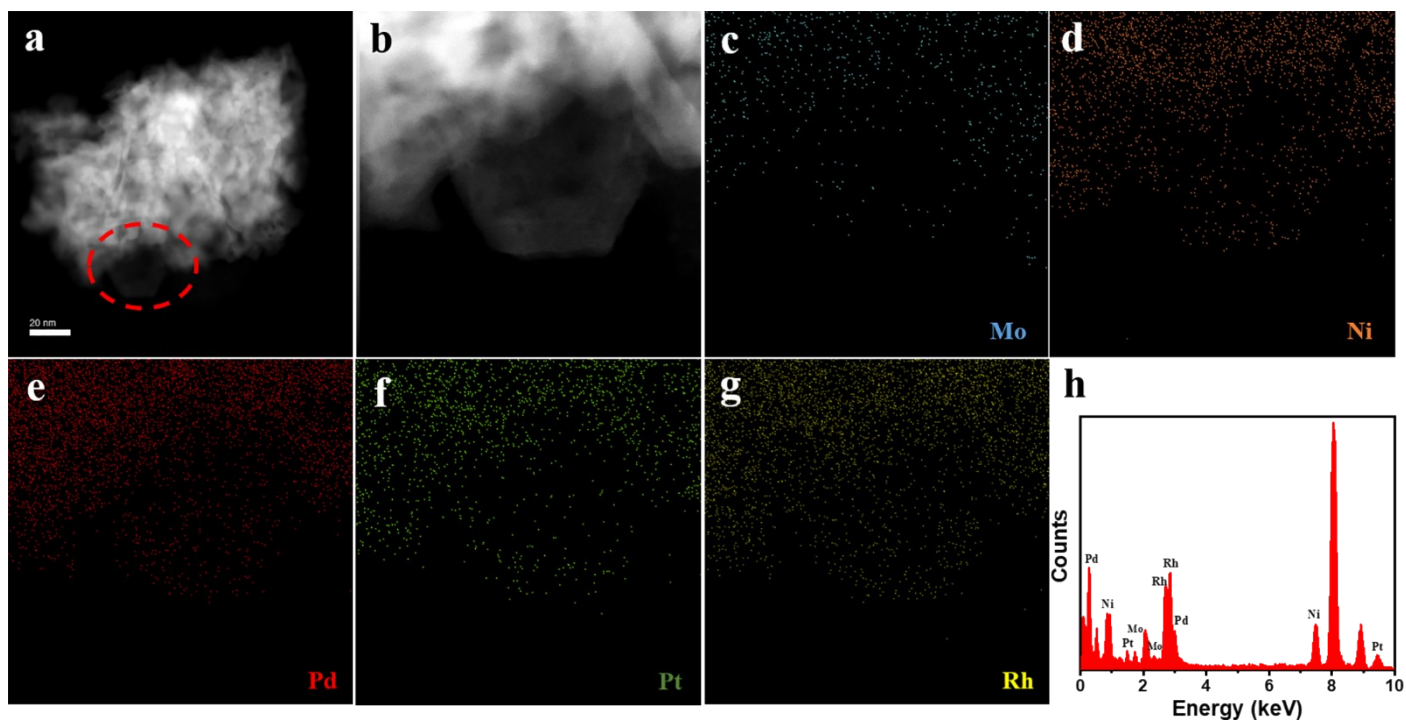

**Figure S4.** (a) (b) HADDF images, (c-g) elemental mapping, and (h) EDS spectrum and the corresponding atomic ratio of  $\text{Pt}_{33}\text{Mo}_6\text{Pd}_{33}\text{Rh}_{18}\text{Ni}_{10}$  NCs.

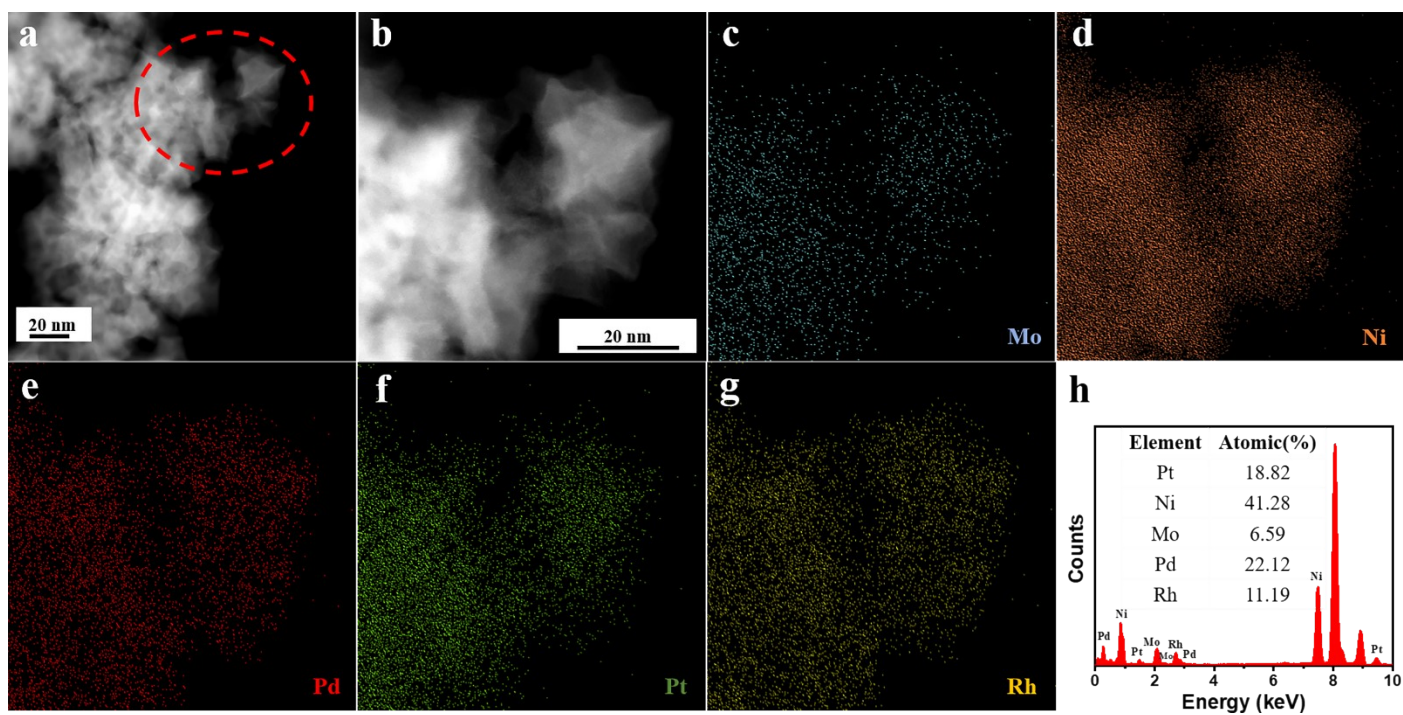

**Figure S5.** (a) (b) HADDF images, (c-g) elemental mapping, and (h) EDS spectrum and the corresponding atomic ratio of  $\text{Pt}_{18}\text{Mo}_6\text{Pd}_{24}\text{Rh}_{12}\text{Ni}_{40}$  NCs.

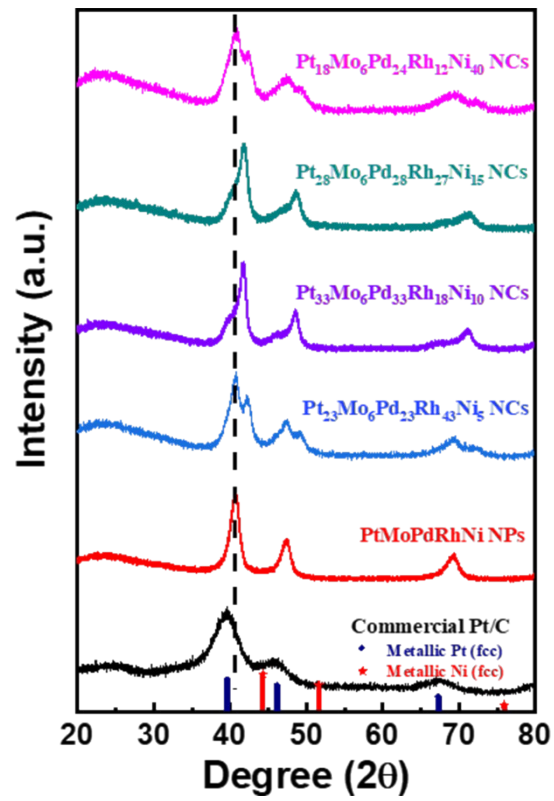

**Figure S6.** XRD patterns of commercial Pt/C, PtMoPdRhNi NPs and PtMoPdRhNi NCs.



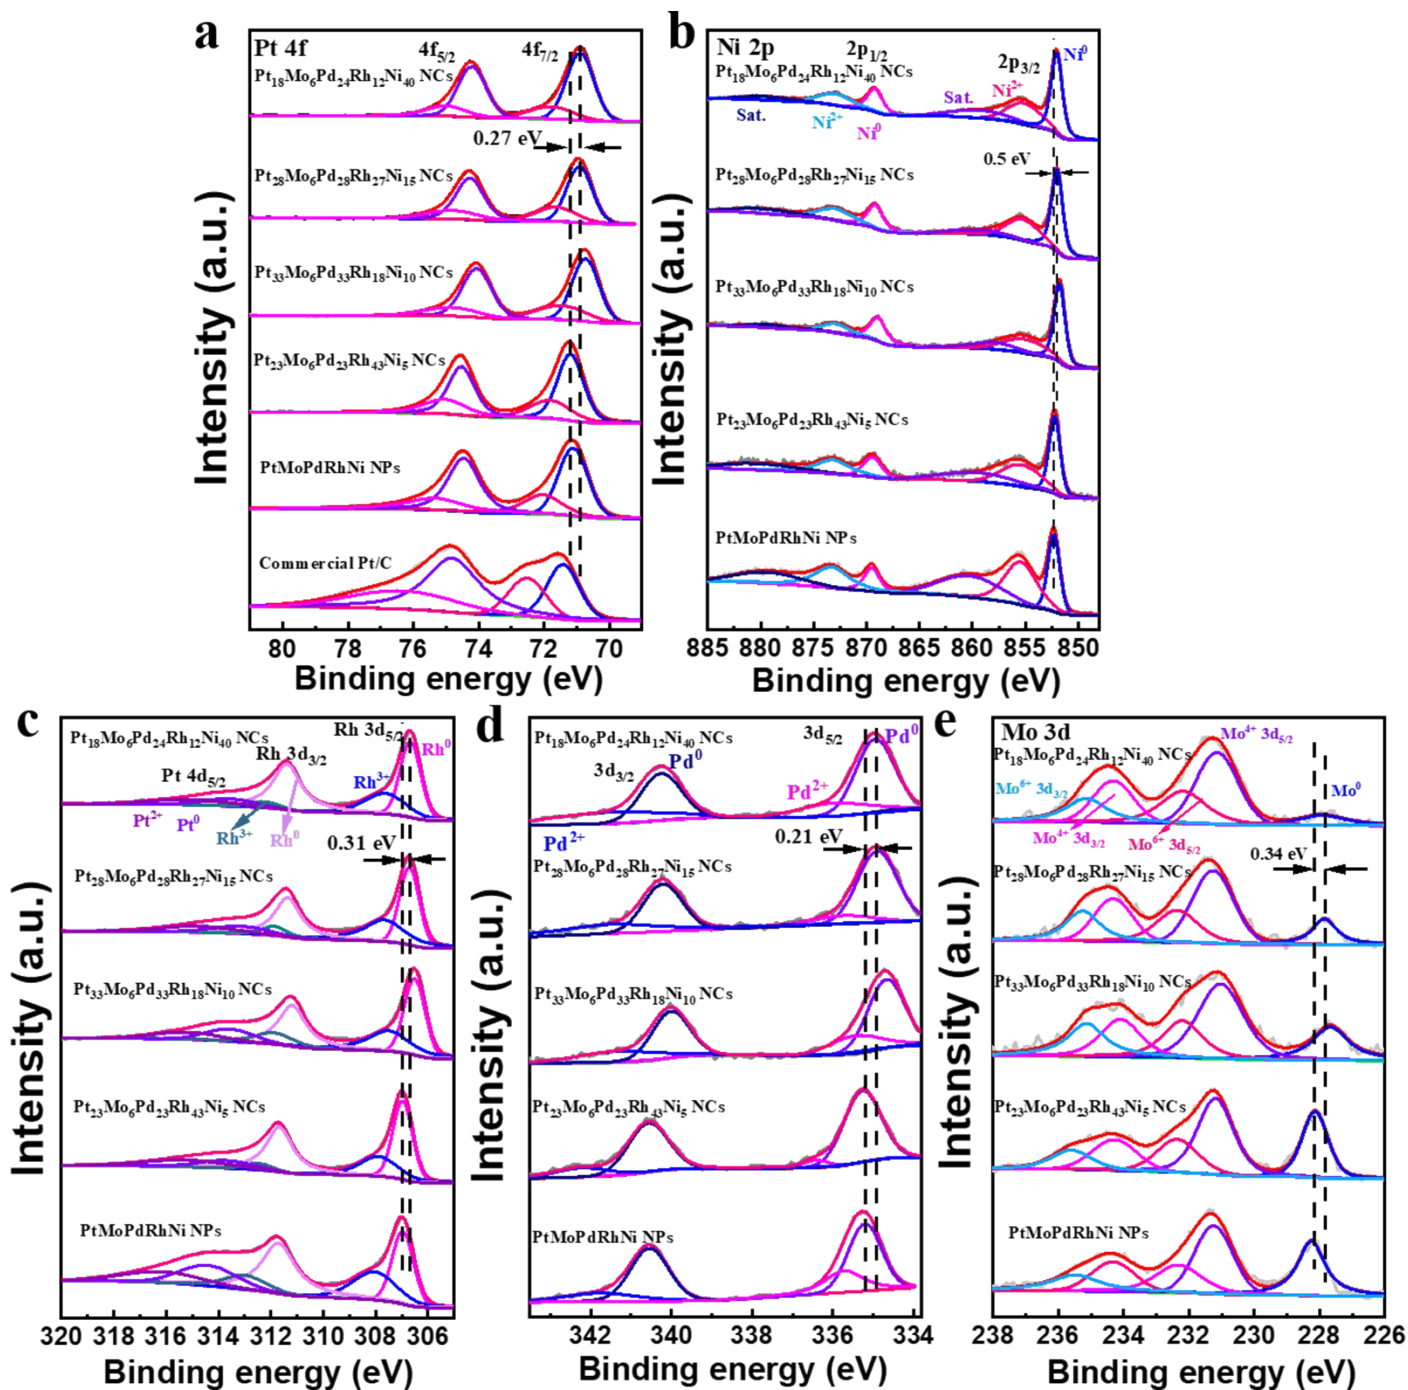

**Figure S7.** XPS spectra of (a) Pt 4f, (b) Ni 2p, (c) Rh 3d, (d) Pd 3d, (e) Mo 3d of commercial Pt/C, PtMoPdRhNi NPs and PtMoPdRhNi NCs.

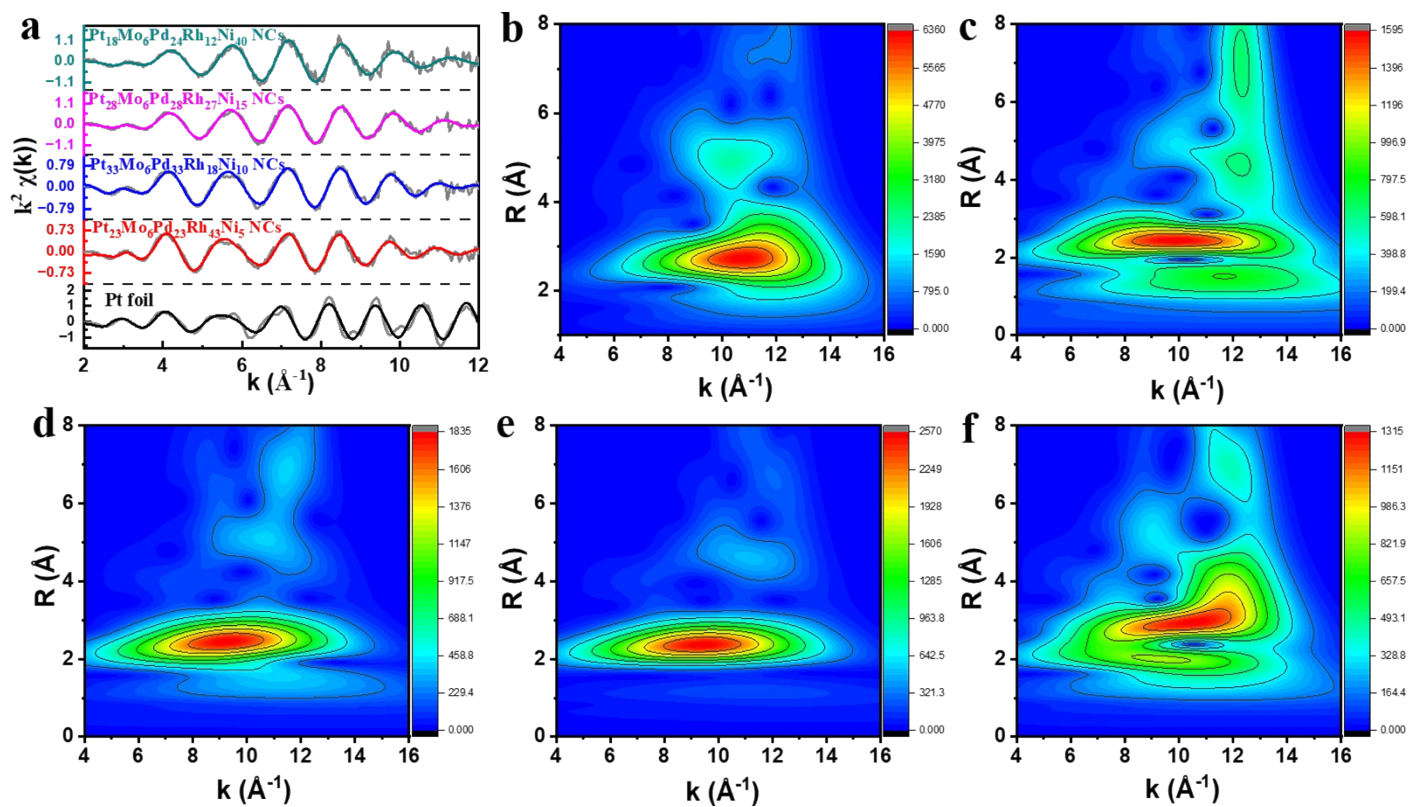

**Figure S8.** (a)  $k^2$ -weighted EXAFS in  $k$  space Pt  $L_3$ -edge in PtMoPdRhNi NCs, (b-f) Wavelet transformed XAS signal of Pt foil, Pt<sub>23</sub>Mo<sub>6</sub>Pd<sub>23</sub>Rh<sub>43</sub>Ni<sub>5</sub>, Pt<sub>33</sub>Mo<sub>6</sub>Pd<sub>33</sub>Rh<sub>18</sub>Ni<sub>10</sub>, Pt<sub>28</sub>Mo<sub>6</sub>Pd<sub>28</sub>Rh<sub>27</sub>Ni<sub>15</sub>, Pt<sub>18</sub>Mo<sub>6</sub>Pd<sub>24</sub>Rh<sub>12</sub>Ni<sub>40</sub>, respectively.

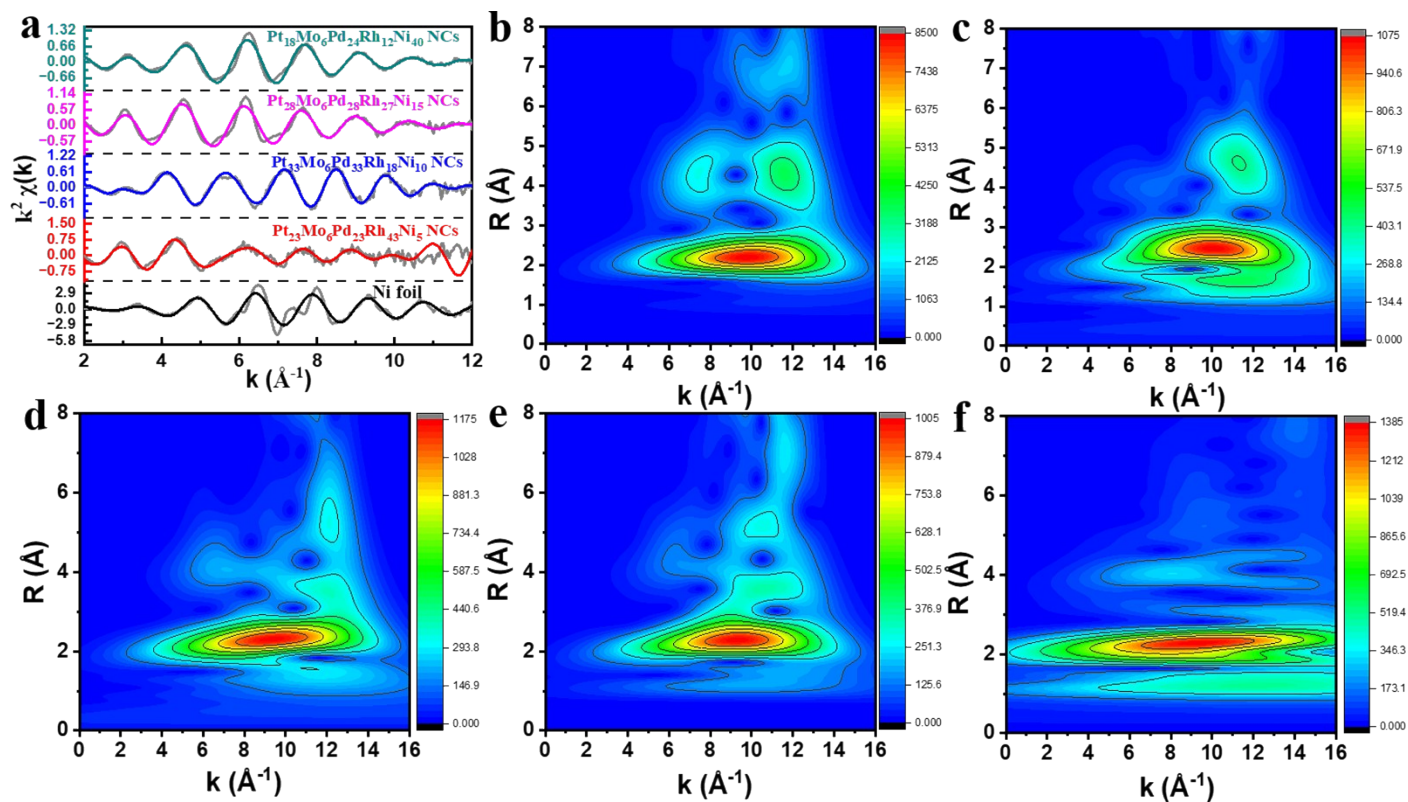

**Figure S9.** (a)  $k^2$ -weighted EXAFS in  $k$  space of Ni K-edge in PtMoPdRhNi NCs, (b-f) Wavelet transformed XAS signal of Ni foil,  $\text{Pt}_{23}\text{Mo}_6\text{Pd}_{23}\text{Rh}_{43}\text{Ni}_{15}$ ,  $\text{Pt}_{33}\text{Mo}_6\text{Pd}_{33}\text{Rh}_{18}\text{Ni}_{10}$ ,  $\text{Pt}_{28}\text{Mo}_6\text{Pd}_{28}\text{Rh}_{27}\text{Ni}_{15}$ ,  $\text{Pt}_{18}\text{Mo}_6\text{Pd}_{24}\text{Rh}_{12}\text{Ni}_{40}$ , respectively.

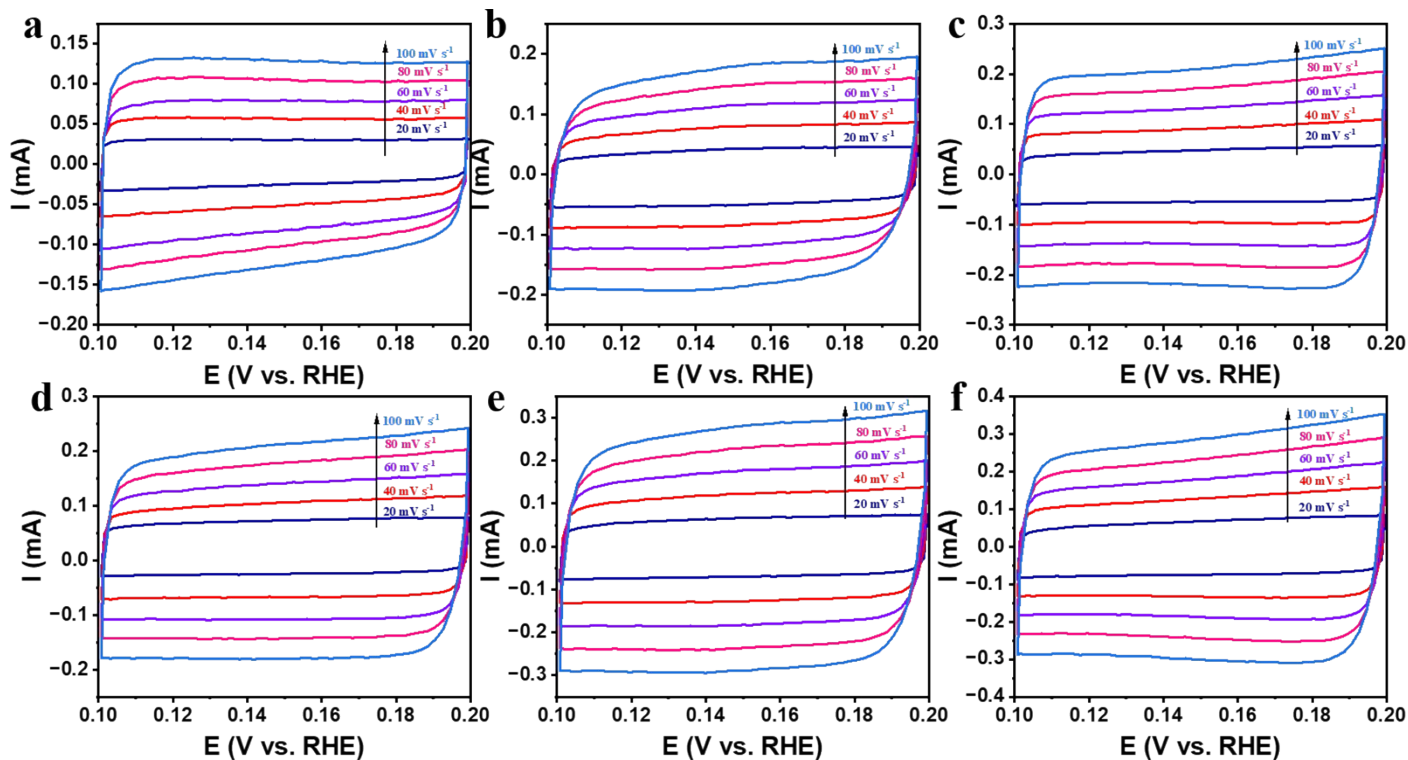

**Figure S10.** Typical CVs of the samples with scanning rates ranging from 20 to 100  $\text{mV s}^{-1}$  of (a) commercial Pt/C, (b) PtMoPdRhNi NPs, (c)  $\text{Pt}_{23}\text{Mo}_6\text{Pd}_{23}\text{Rh}_{43}\text{Ni}_5$  NCs, (d)  $\text{Pt}_{33}\text{Mo}_6\text{Pd}_{33}\text{Rh}_{18}\text{Ni}_{10}$  NCs, (e)  $\text{Pt}_{28}\text{Mo}_6\text{Pd}_{28}\text{Rh}_{27}\text{Ni}_{15}$  NCs, (f)  $\text{Pt}_{18}\text{Mo}_6\text{Pd}_{24}\text{Rh}_{12}\text{Ni}_{40}$  NCs, respectively. The scanning potential range is from 0.10 V to 0.20 V in 1.0 M KOH solution.



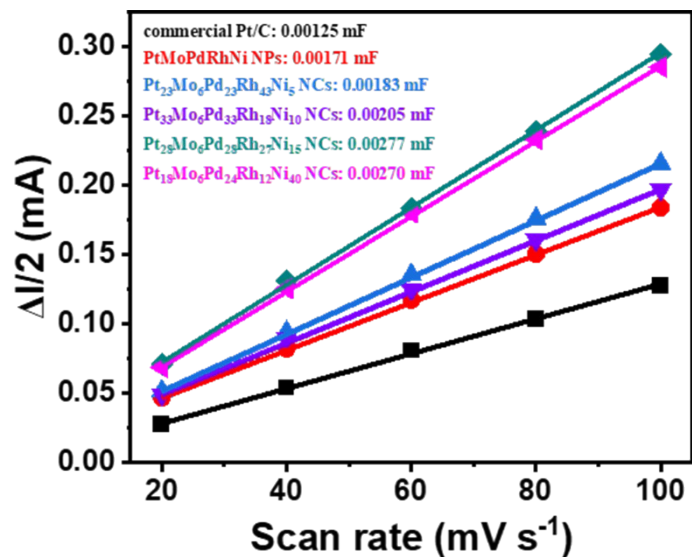

**Figure S11.** The estimation of  $C_{dl}$  by plotting the capacitive current density against the scan rate to fit a linear regression of PtMoPdRhNi NCs, PtMoPdRhNi NPs and commercial Pt/C.

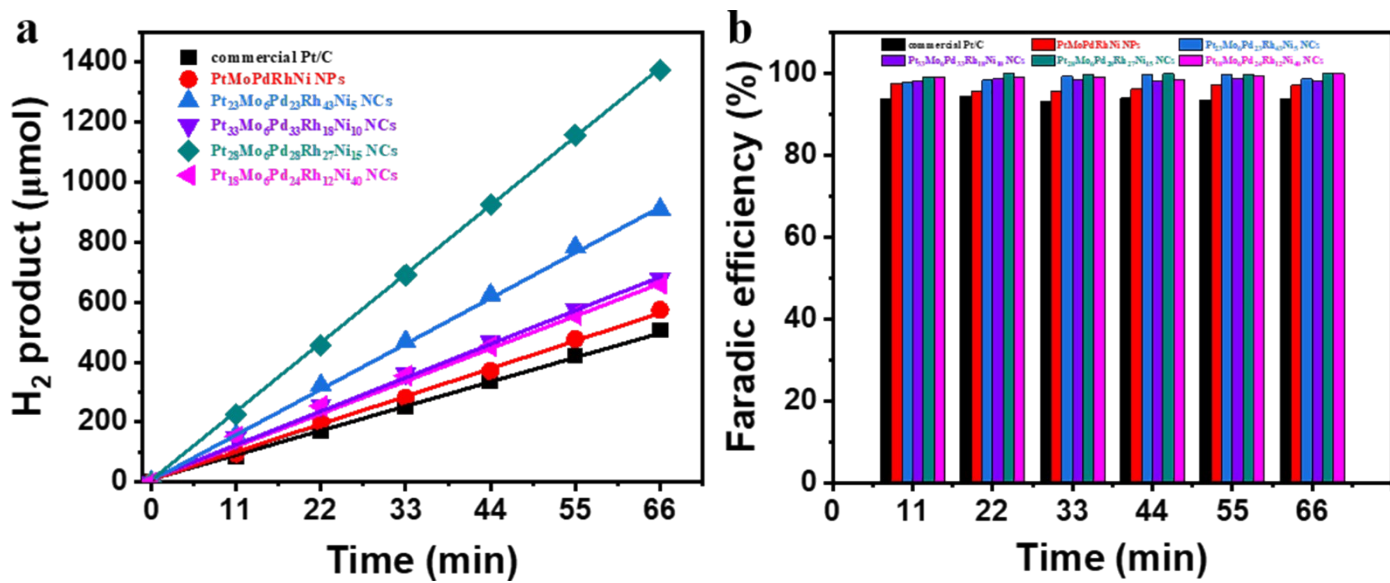

**Figure S12.** (a) H<sub>2</sub> product and (b) faradaic efficiency of commercial Pt/C, PtMoPdRhNi NPs and PtMoPdRhNi NCs at the overpotential of 100 mV.

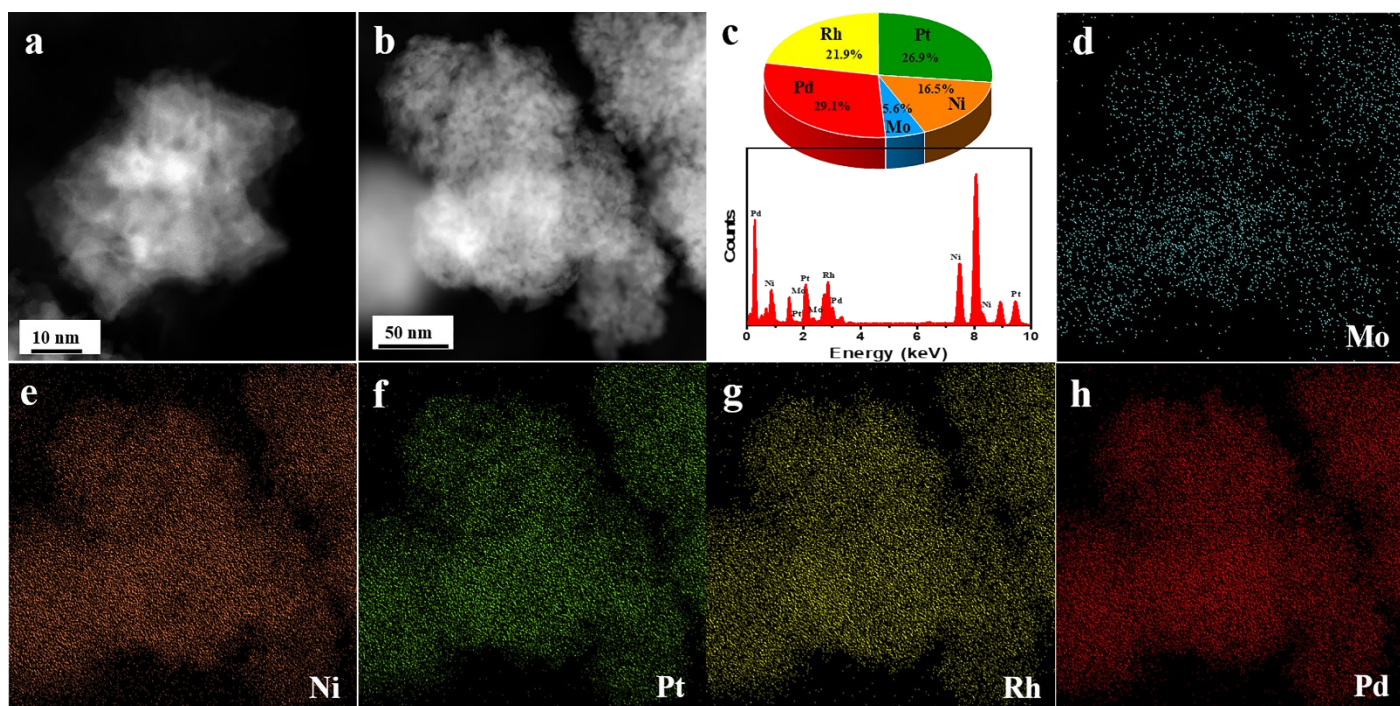

**Figure S13.** (a) (b) TEM images of Pt<sub>28</sub>Mo<sub>6</sub>Pd<sub>28</sub>Rh<sub>27</sub>Ni<sub>15</sub> NCs after 5,000 cycles for ADTs, (c) EDS spectrum and the corresponding atomic ratio, (d-h) EDS element mapping of (b).

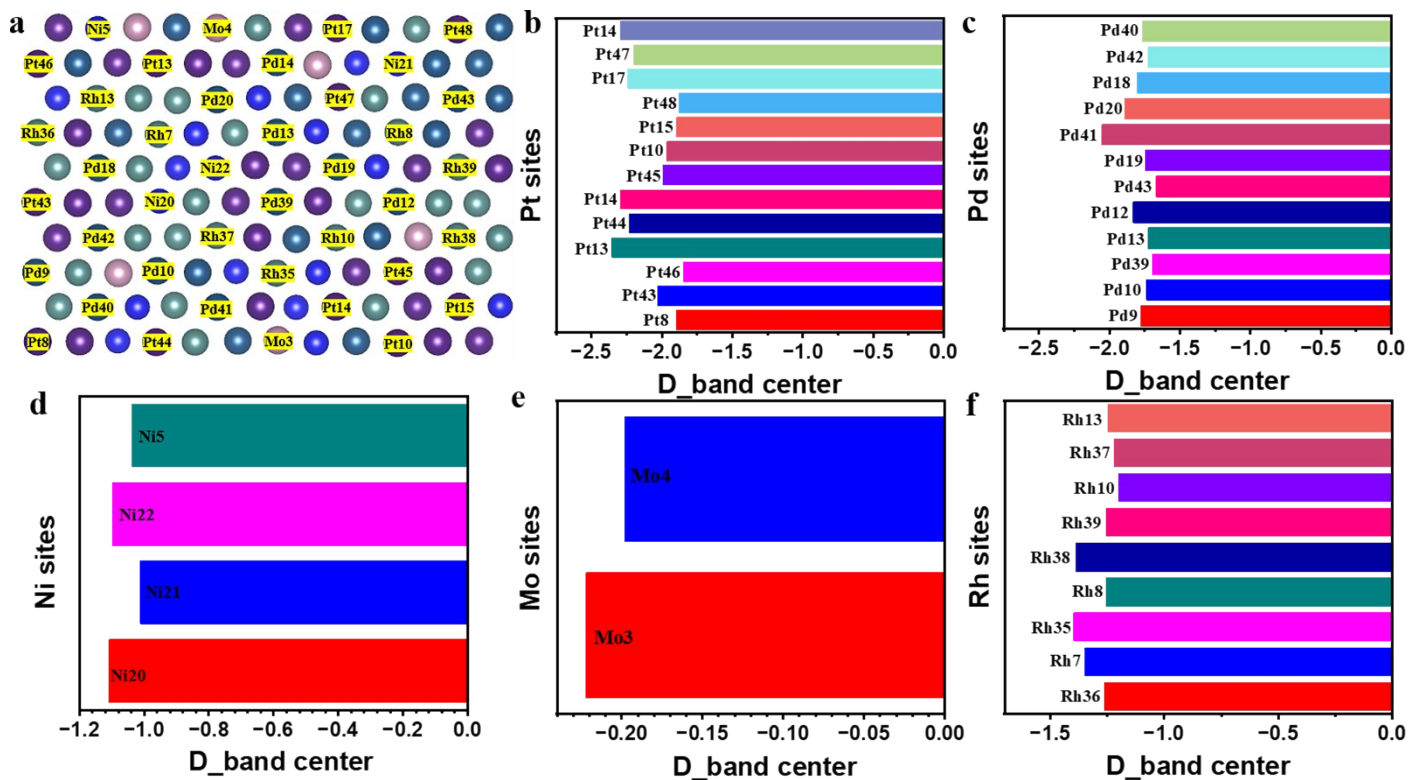

**Figure S14.** (a) the top view of calculation model with labels, (b) Pt sites, (c) Pd sites, (d) Rh sites, (e) Mo sites and (f) Rh sites with d band center of the surface constitute metals in

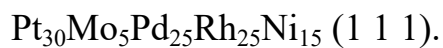

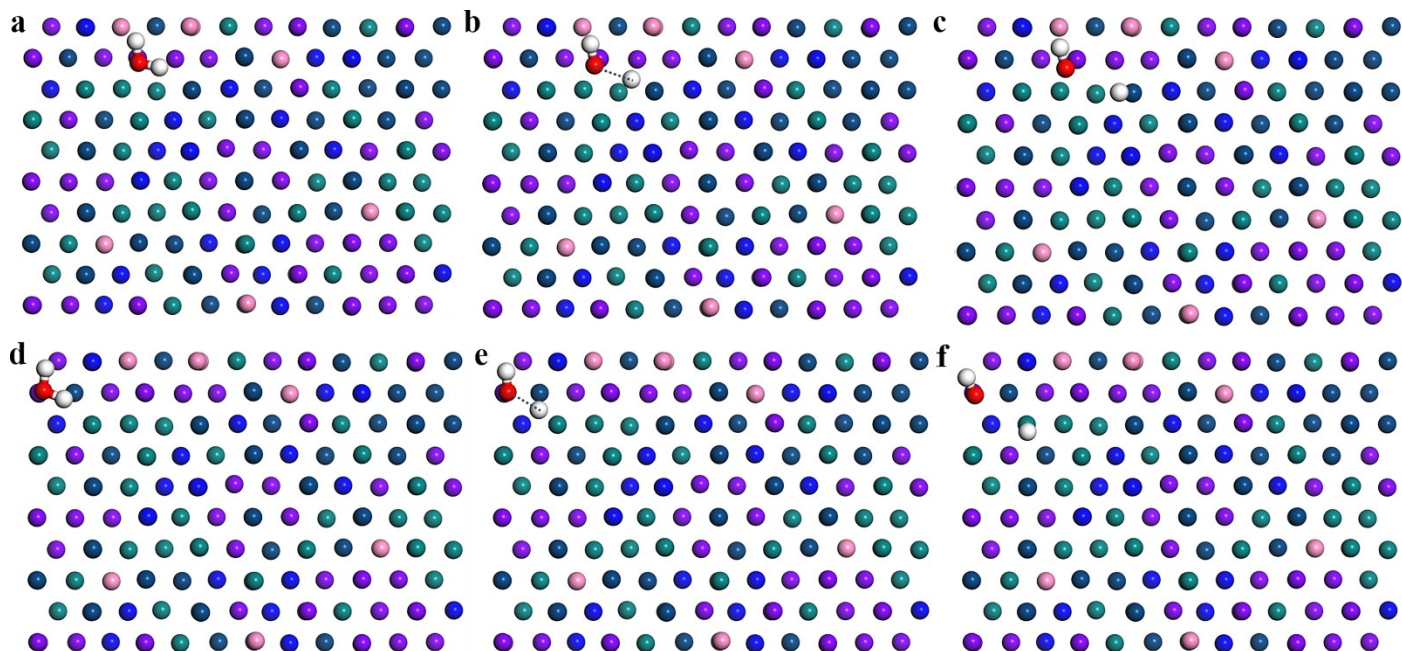

**Figure S15.** Binding configurations at (a-c) Pt13 and (d-f) Pt46.



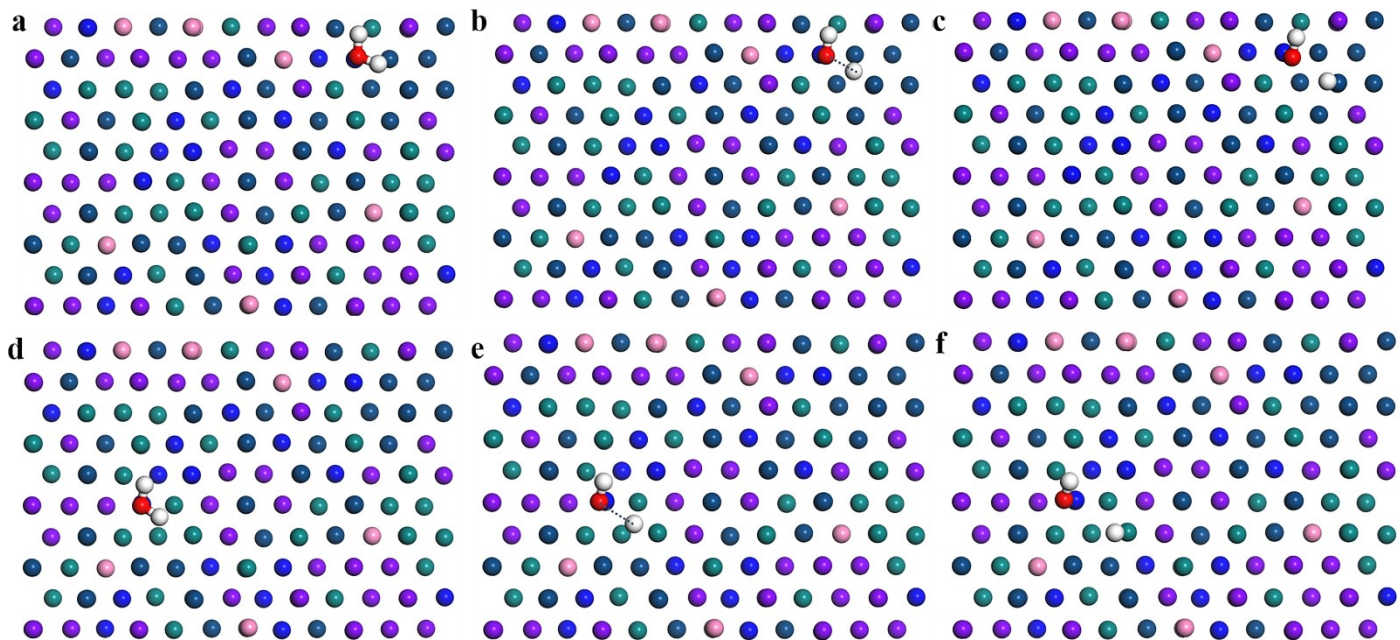

**Figure S16.** Binding configurations at (a-c) Ni21 and (d-f) Ni20.

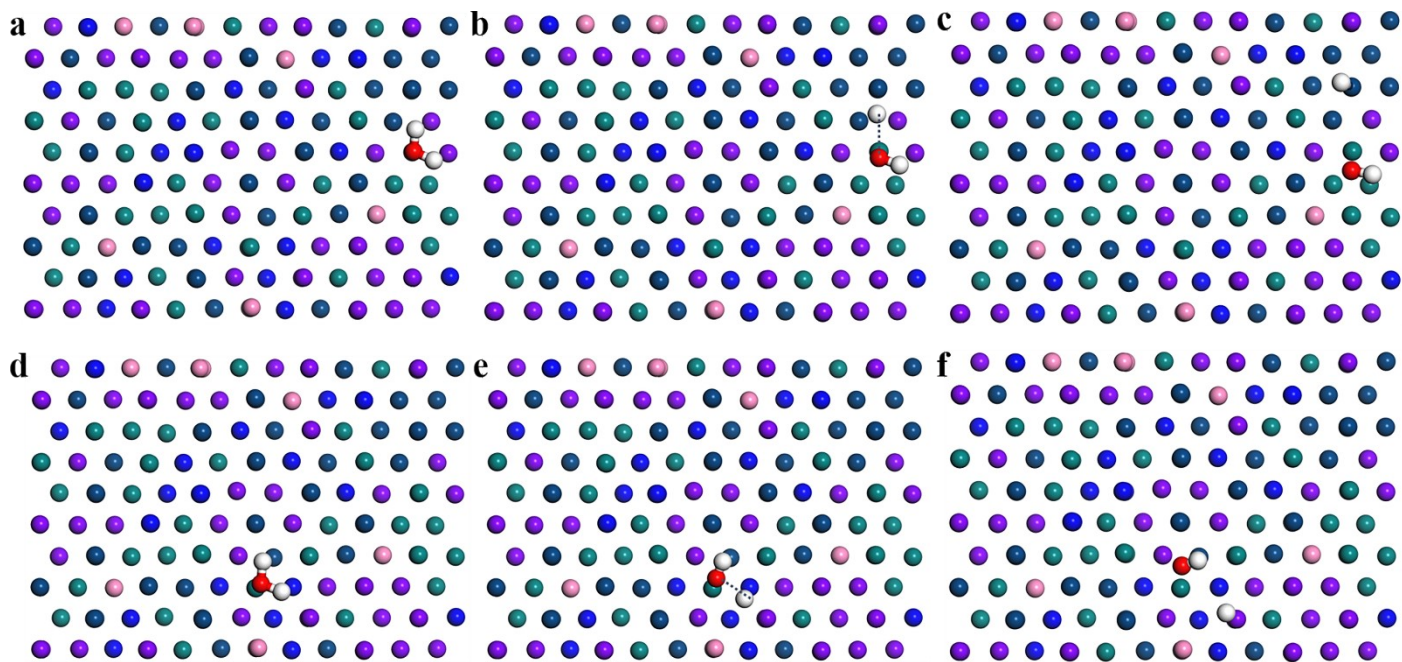

**Figure S17.** Binding configurations at (a-c) Rh39 and (d-f) Rh35.

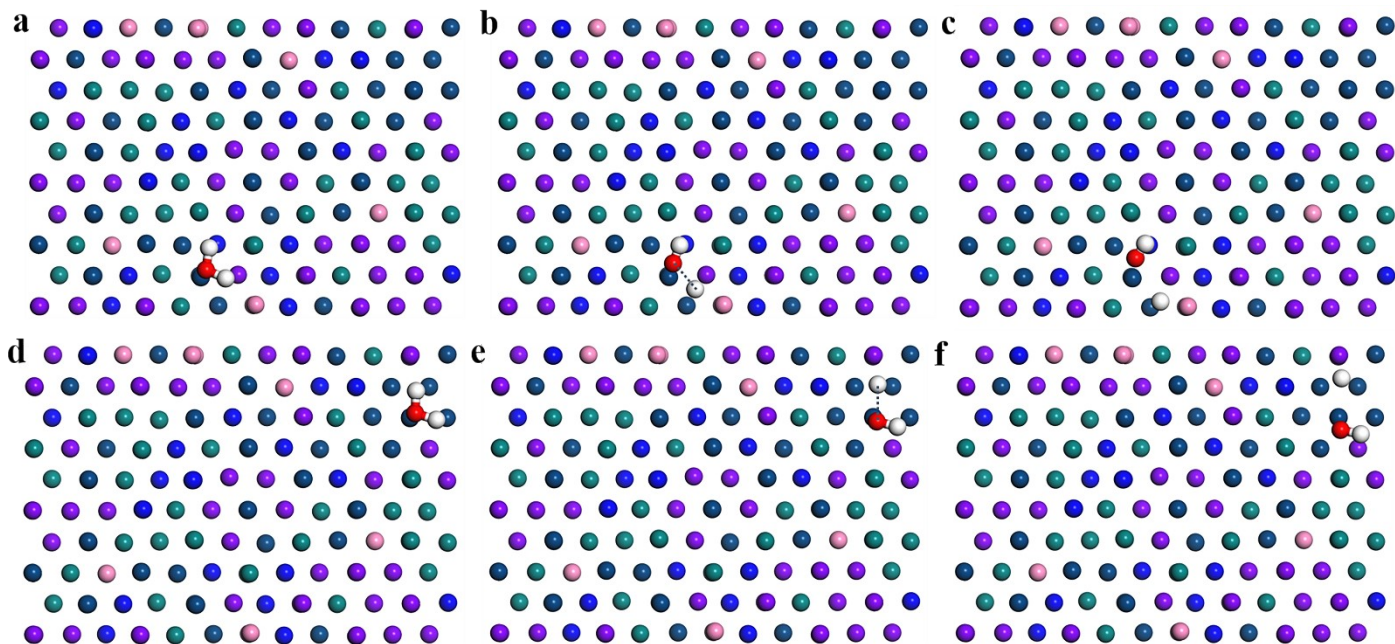

**Figure S18.** Binding configurations at (a-c) Pd41 and (d-f) Pd43.



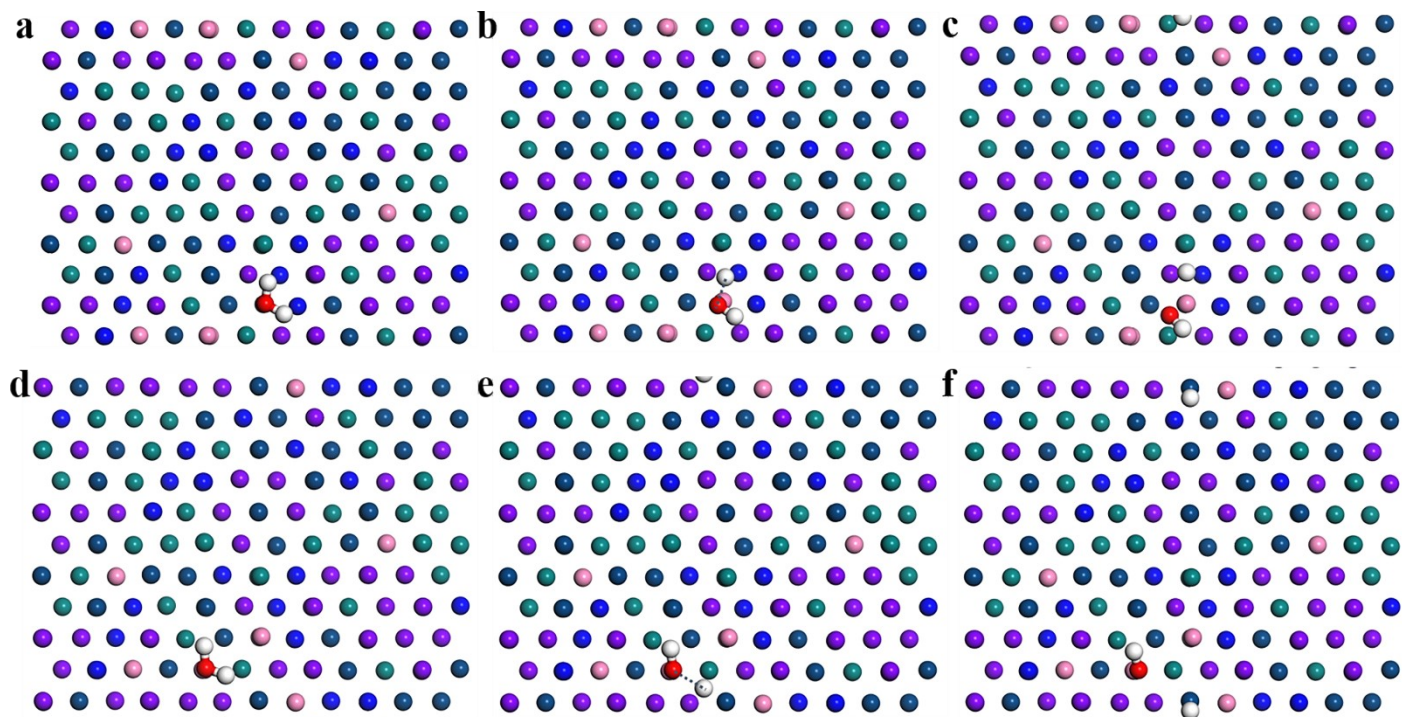

**Figure S19.** Binding configurations at (a-c) Mo3 and (d-f) Mo4.

**Table S1.** The ICP analysis of the PtMoPdRhNi NCs. The units are atomic percentages (atom%).

| sample                                                                                  | Pt   | Ni   | Mo  | Pd   | Rh   |
|-----------------------------------------------------------------------------------------|------|------|-----|------|------|
| Pt <sub>23</sub> Mo <sub>6</sub> Pd <sub>23</sub> Rh <sub>43</sub> Ni <sub>5</sub> NCs  | 23.1 | 5.3  | 6.2 | 23.2 | 42.2 |
| Pt <sub>33</sub> Mo <sub>6</sub> Pd <sub>33</sub> Rh <sub>18</sub> Ni <sub>10</sub> NCs | 33.2 | 10.4 | 6.1 | 33.2 | 17.1 |
| Pt <sub>28</sub> Mo <sub>6</sub> Pd <sub>28</sub> Rh <sub>27</sub> Ni <sub>15</sub> NCs | 28.3 | 15.3 | 6.1 | 27.8 | 22.5 |
| Pt <sub>18</sub> Mo <sub>6</sub> Pd <sub>24</sub> Rh <sub>12</sub> Ni <sub>40</sub> NCs | 18.2 | 40.2 | 6.3 | 23.7 | 11.6 |

**Table S2.** The fitted lattice parameters (interplanar spacing (d) and lattice constant) of PtMoPdRhNi NCs and PtMoPdRhNi NPs.

| Catalysts                                                                               | d (1 1 1)<br>(Å) | d (2 0 0)<br>(Å) | d (2 2 0)<br>(Å) | Lattice<br>constant<br>(a=b=c, Å) |
|-----------------------------------------------------------------------------------------|------------------|------------------|------------------|-----------------------------------|
| Pt <sub>23</sub> Mo <sub>6</sub> Pd <sub>23</sub> Rh <sub>43</sub> Ni <sub>5</sub> NCs  | 2.22             | 1.92             | 1.35             | 3.83                              |
| Pt <sub>33</sub> Mo <sub>6</sub> Pd <sub>33</sub> Rh <sub>18</sub> Ni <sub>10</sub> NCs | 2.16             | 1.87             | 1.32             | 3.74                              |
| Pt <sub>28</sub> Mo <sub>6</sub> Pd <sub>28</sub> Rh <sub>27</sub> Ni <sub>15</sub> NCs | 2.16             | 1.87             | 1.32             | 3.74                              |
| Pt <sub>18</sub> Mo <sub>6</sub> Pd <sub>24</sub> Rh <sub>12</sub> Ni <sub>40</sub> NCs | 2.20             | 1.91             | 1.35             | 3.82                              |
| PtMoPdRhNi NPs                                                                          | 2.21             | 1.92             | 1.36             | 3.83                              |

**Table S3.** Structural parameters of CN, bond distance (R), Debye factor ( $\sigma^2$ ) and R factor from EXAFS fitting of Pt foil, PtMoPdRhNi NCs. The data is  $k^2$ -weighted and not phase-corrected, and the fitting range of PtMoPdRhNi NCs is  $1.85 < k < 10.45 \text{ \AA}^{-1}$ ,  $1.2 < R < 3.8 \text{ \AA}$ .

| Sample                                                                                     | Scatter path | CN          | R/ $\text{\AA}$ | $\sigma^2/\text{\AA}^2$ | R factor |
|--------------------------------------------------------------------------------------------|--------------|-------------|-----------------|-------------------------|----------|
| Pt foil                                                                                    | Pt-Pt        | 12          | 2.76            | 0.003                   | 0.9%     |
| Pt <sub>23</sub> Mo <sub>6</sub> Pd <sub>23</sub> Rh <sub>43</sub> Ni <sub>5</sub><br>NCs  | Pt-Pd        | 4.98 ± 1.37 | 2.67            | 0.0085                  |          |
|                                                                                            | Pt-Ni        | 3.82 ± 0.97 | 2.69            | 0.0085                  | 1.8%     |
|                                                                                            | Pt-Pt        | 6.88 ± 2.31 | 2.70            | 0.0085                  |          |
| Pt <sub>33</sub> Mo <sub>6</sub> Pd <sub>33</sub> Rh <sub>18</sub> Ni <sub>10</sub><br>NCs | Pt-Pd        | 1.71 ± 0.32 | 2.72            | 0.0006                  |          |
|                                                                                            | Pt-Ni        | 7.96 ± 1.32 | 2.63            | 0.0006                  | 0.9%     |
|                                                                                            | Pt-Pt        | 2.84 ± 0.48 | 2.71            | 0.0006                  |          |
| Pt <sub>28</sub> Mo <sub>6</sub> Pd <sub>28</sub> Rh <sub>27</sub> Ni <sub>15</sub><br>NCs | Pt-Pd        | 2.93 ± 0.86 | 2.68            | 0.0054                  |          |
|                                                                                            | Pt-Ni        | 5.35 ± 0.73 | 2.62            | 0.0054                  | 0.2%     |
|                                                                                            | Pt-Pt        | 3.37 ± 1.17 | 2.68            | 0.0054                  |          |
| Pt <sub>18</sub> Mo <sub>6</sub> Pd <sub>24</sub> Rh <sub>12</sub> Ni <sub>40</sub><br>NCs | Pt-Pd        | 2.69 ± 1.05 | 2.65            | 0.0085                  |          |
|                                                                                            | Pt-Ni        | 6.65 ± 1.77 | 2.60            | 0.0085                  | 1.0%     |
|                                                                                            | Pt-Pt        | 4.04 ± 1.45 | 2.72            | 0.0085                  |          |

**Table S4.** Structural parameters of CN, bond distance (R), Debye factor ( $\sigma^2$ ) and R factor from EXAFS fitting of Ni foil, PtMoPdRhNi NCs. The data is  $k^2$ -weighted and not phase-corrected, and the fitting range of PtMoPdRhNi NCs is  $2.09 < k < 10.53 \text{ \AA}^{-1}$ ,  $1.0 < R < 3.6 \text{ \AA}$ .

| Sample                                                                                     | Scatter path | CN              | R/ $\text{\AA}$ | $\sigma^2/\text{\AA}^2$ | R factor |
|--------------------------------------------------------------------------------------------|--------------|-----------------|-----------------|-------------------------|----------|
| Ni foil                                                                                    | Ni-Ni        | 12              | 2.48            | 0.0058                  | 0.4%     |
| Pt <sub>23</sub> Mo <sub>6</sub> Pd <sub>23</sub> Rh <sub>43</sub> Ni <sub>5</sub><br>NCs  | Ni-Pt        | $2.59 \pm 0.78$ | 2.69            | 0.0006                  | 2.3%     |
|                                                                                            | Ni-Rh        | $1.92 \pm 0.28$ | 2.58            | 0.0006                  |          |
|                                                                                            | Ni-Ni/Mo     | $0.75 \pm 0.18$ | 2.52/2.43       | 0.0006                  |          |
|                                                                                            | Ni-O         | $0.74 \pm 0.27$ | 1.91            | 0.0006                  |          |
| Pt <sub>33</sub> Mo <sub>6</sub> Pd <sub>33</sub> Rh <sub>18</sub> Ni <sub>10</sub><br>NCs | Ni-Pt        | $2.61 \pm 1.29$ | 2.63            | 0.0125                  | 1.2%     |
|                                                                                            | Ni-Rh        | $1.95 \pm 0.75$ | 2.63            | 0.0125                  |          |
|                                                                                            | Ni-Ni        | $5.26 \pm 1.20$ | 2.59            | 0.0125                  |          |
|                                                                                            | Ni-O         | $0.67 \pm 0.27$ | 1.96            | 0.0125                  |          |
| Pt <sub>28</sub> Mo <sub>6</sub> Pd <sub>28</sub> Rh <sub>27</sub> Ni <sub>15</sub><br>NCs | Ni-Pt        | $1.27 \pm 0.38$ | 2.62            | 0.011                   | 0.5%     |
|                                                                                            | Ni-Rh        | $2.51 \pm 0.83$ | 2.62            | 0.011                   |          |
|                                                                                            | Ni-Ni        | $6.35 \pm 1.36$ | 2.57            | 0.011                   |          |
|                                                                                            | Ni-O         | $0.14 \pm 0.05$ | 1.97            | 0.011                   |          |
| Pt <sub>18</sub> Mo <sub>6</sub> Pd <sub>24</sub> Rh <sub>12</sub> Ni <sub>40</sub><br>NCs | Ni-Pt        | $1.79 \pm 0.74$ | 2.60            | 0.011                   | 1.3%     |
|                                                                                            | Ni-Rh        | $1.98 \pm 0.07$ | 2.61            | 0.011                   |          |
|                                                                                            | Ni-Ni        | $6.94 \pm 1.32$ | 2.56            | 0.011                   |          |
|                                                                                            | Ni-O         | $1.21 \pm 0.39$ | 2.08            | 0.011                   |          |

**Table S5.** Comparison of PtMoPdRhNi NCs and reported Pt-based/ HEA catalysts for HER in 1 M KOH.

| Catalysts                                                                                          | Noble metal loading<br>( $\mu\text{g cm}^{-2}$ ) | Overpotential @-10mA $\text{cm}^{-2}$<br>(mV) | Tafel slope (mV<br>$\text{dec}^{-1}$ ) |
|----------------------------------------------------------------------------------------------------|--------------------------------------------------|-----------------------------------------------|----------------------------------------|
| Pt <sub>28</sub> Mo <sub>6</sub> Pd <sub>28</sub> Rh <sub>27</sub> Ni <sub>15</sub> NCs            | 21.44                                            | 9.7                                           | 25.9                                   |
| Pt <sub>23</sub> Mo <sub>6</sub> Pd <sub>23</sub> Rh <sub>43</sub> Ni <sub>5</sub> NCs             | 21.44                                            | 15.9                                          | 30.3                                   |
| Pt <sub>18</sub> Mo <sub>6</sub> Pd <sub>24</sub> Rh <sub>12</sub> Ni <sub>40</sub> NCs            | 21.44                                            | 20.1                                          | 30.5                                   |
| Pt <sub>33</sub> Mo <sub>6</sub> Pd <sub>33</sub> Rh <sub>18</sub> Ni <sub>10</sub> NCs            | 21.44                                            | 22.2                                          | 26.9                                   |
| FeCoNiAlTi <sup>12</sup>                                                                           | -                                                | 88.2                                          | 40.1                                   |
| FeCoPdIrPt <sup>13</sup>                                                                           | -                                                | 42                                            | 82                                     |
| Pt <sub>18</sub> Ni <sub>26</sub> Fe <sub>15</sub> Co <sub>14</sub> Cu <sub>27</sub> <sup>14</sup> | -                                                | 44                                            | 41                                     |
| PdFeCoNiCu <sup>15</sup>                                                                           | -                                                | 18                                            | 39                                     |
| IrPdPtRhRu <sup>16</sup>                                                                           | -                                                | 17                                            |                                        |
| Nanosponge-like<br>PdPtCuNiP <sup>17</sup>                                                         | -                                                | 32                                            | 37.4                                   |
| PtSn@PtCo Heterojunction <sup>18</sup>                                                             | -                                                | 25                                            | 24                                     |
| PtNi <sub>5-0.3</sub> <sup>19</sup>                                                                | -                                                | 26.8                                          | 19.2                                   |
| Pt Clusters@MXene <sup>20</sup>                                                                    | 42.1                                             | 34                                            | 29.7                                   |
| Dp-Pt <sup>21</sup>                                                                                | 10                                               | 25                                            | 52                                     |
| PtSe <sub>2</sub> /Pt Heterointerface <sup>22</sup>                                                | -                                                | 42                                            | 53                                     |
| CNs@CoPt <sup>23</sup>                                                                             | -                                                | 19.1                                          | 54.3                                   |
| Pt on NiRu-hydroxide <sup>24</sup>                                                                 | -                                                | 38                                            | 39                                     |
| NF-Na-Fe-Pt <sup>25</sup>                                                                          | -                                                | 31                                            | 35.98                                  |
| Pt-V <sub>2</sub> CTx <sup>26</sup>                                                                | 16                                               | 68.1                                          | 98.6                                   |
| Pt/PtTex <sup>27</sup>                                                                             | -                                                | 23                                            | 23                                     |
| PtNi Ass <sup>28</sup>                                                                             | -                                                | 27.5                                          | 27                                     |
| PtNi@Ti <sub>3</sub> C <sub>2</sub> MXenes <sup>29</sup>                                           | -                                                | 36                                            | 59                                     |
| Pt-Ni(N) NWs <sup>30</sup>                                                                         | 17                                               | 13                                            | 29                                     |
| PtRu NCs/BP <sup>31</sup>                                                                          | -                                                | 22                                            | 43                                     |
| Pt-Ni NTAs <sup>32</sup>                                                                           | 56                                               | 23                                            | 38                                     |
| PtSA-NiO/Ni <sup>33</sup>                                                                          | 14.8                                             | 26                                            | 27.07                                  |
| Pt-NiNWs <sup>34</sup>                                                                             | -                                                | 40                                            | -                                      |
| Pt NWs/SL-Ni(OH) <sub>2</sub> <sup>35</sup>                                                        | -                                                | 70                                            | -                                      |
| FeCoNiCuPd thin-film <sup>36</sup>                                                                 | 15.3                                             | 29                                            | 47.2                                   |

**Table S6.** The electrochemical impedance spectra fitting results of PtMoPdRhNi NCs, PtMoPdRhNi NPs and commercial Pt/C. (Rs: solution resistance; Rct: charge transfer resistance)

| Catalysts                                                                               | Rs  | Rct  |
|-----------------------------------------------------------------------------------------|-----|------|
| Pt <sub>23</sub> Mo <sub>6</sub> Pd <sub>23</sub> Rh <sub>43</sub> Ni <sub>5</sub> NCs  | 4.5 | 5.1  |
| Pt <sub>33</sub> Mo <sub>6</sub> Pd <sub>33</sub> Rh <sub>18</sub> Ni <sub>10</sub> NCs | 4.9 | 8.5  |
| Pt <sub>28</sub> Mo <sub>6</sub> Pd <sub>28</sub> Rh <sub>27</sub> Ni <sub>15</sub> NCs | 4.7 | 3.1  |
| Pt <sub>18</sub> Mo <sub>6</sub> Pd <sub>24</sub> Rh <sub>12</sub> Ni <sub>40</sub> NCs | 4.7 | 4.8  |
| PtMoPdRhNi NPs                                                                          | 4.3 | 11.9 |
| Commercial Pt/C                                                                         | 6.3 | 36.9 |

**Table S7.** A series of DFT results identifying the stable adsorption sites of H\* on Pt<sub>30</sub>Mo<sub>5</sub>Pd<sub>25</sub>Rh<sub>25</sub>Ni<sub>15</sub> (1 1 1) surfaces and its corresponding  $\Delta G_{H^*}$  (eV).

| Initial position | Optimized position | $\Delta G_{H^*}$ |
|------------------|--------------------|------------------|
| Pt top           | Pt top             | -0.01            |
| Pt top           | Pt-Rh-Mo           | -0.14            |
| Pd top           | Ni-Rh-Pd           | -0.14            |
| Pd top           | Rh-Pd-Rh           | -0.17            |
| Pt top           | Pt top             | -0.12            |
| Pt top           | Pt top             | -0.06            |
| Pt top           | Pd-Pd-Pt           | -0.01            |
| Pt top           | Mo-Pd-Pt           | -0.15            |
| Pt top           | Pt-Ni-Rh           | -0.04            |
| Pt top           | Pt top             | -0.17            |
| Ni top           | Ni-Rh-Ni           | -0.18            |
| Rh top           | Rh top             | -0.03            |
| Rh top           | Pd-Rh-Rh           | -0.14            |
| Rh top           | Rh top             | -0.07            |
| Rh top           | Pd-Rh-Pd           | -0.09            |
| Pd top           | Pd-Pd-Ni           | -0.25            |
| Pd top           | Rh top             | -0.07            |
| Pd top           | Pd-Pd-Pd           | 0.06             |
| Pd top           | Rh-Pd-Pd           | -0.07            |
| Pd top           | Pt-Pd-Pd           | -0.25            |
| Pd top           | Pd-Pd bridge       | -0.06            |
| Pd top           | Pd-Mo-Rh           | -0.09            |
| Mo top           | Ni-Rh-Pd           | -0.12            |
| Mo top           | Mo-Mo-Pd           | -0.28            |
| Pt top           | Pt top             | -0.10            |
| Pt top           | Pt top             | -0.16            |
| Pt top           | Pt top             | -0.15            |
| Pt top           | Pt top             | -0.16            |
| Pd top           | Pd-Pd-Ni           | -0.03            |
| Ni top           | Ni top             | 0.27             |
| Ni top           | Pt-Pd-Ni           | -0.01            |
| Ni top           | Pd-Rh-Ni           | -0.25            |
| Rh top           | Pd-Rh-Pd           | -0.12            |
| Rh top           | Pd-Rh-Mo           | -0.09            |
| Rh top           | Rh top             | -0.08            |
| Rh top           | Rh top             | -0.12            |
| Pd top           | Pd-Rh bridge       | 0.18             |
| Pd top           | Pd-Pd-Pd           | -0.24            |
| Pd top           | Pd-Pd bridge       | 0.19             |
| Rh top           | Pd-Rh-Rh           | -0.32            |



1. B. Ravel and M. Newville, *J. Synchrotron Radiat*, 2005, **12**, 537-541.
2. Y.-Y. Ma, C.-X. Wu, X.-J. Feng, H.-Q. Tan, L.-K. Yan, Y. Liu, Z.-H. Kang, E.-B. Wang and Y.-G. Li, *Energy Environ. Sci.*, 2017, **10**, 788-798.
3. D. H. Kweon, M. S. Okyay, S. J. Kim, J. P. Jeon, H. J. Noh, N. Park, J. Mahmood and J. B. Baek, *Nat. Commun.*, 2020, **11**, 1278.
4. G. Kresse and J. Hafner, *Phys. Rev. B Condens Matter.*, 1994, **49**, 14251-14269.
5. G. Kresse and J. Hafner, *Phys. Rev. B Condens Matter.*, 1993, **47**, 558-561.
6. P. E. Blochl, *Phys. Rev. B Condens. Matter.*, 1994, **50**, 17953-17979.
7. J. P. Perdew, K. Burke and M. Ernzerhof, *Phys. Rev. Lett.*, 1996, **77**, 3865-3868.
8. A. Zunger, S. Wei, L. G. Ferreira and J. E. Bernard, *Phys Rev Lett*, 1990, **65**, 353-356.
9. A. v. d. Walle, P. Tiwary, M. d. Jong, D. L. Olmsted, M. Asta, A. Dick, D. Shin, Y. Wang, L.-Q. Chen and Z.-K. Liu, *CALPHAD: Computer Coupling of Phase Diagrams and Thermochemistry*, 2013, **42**, 13-18.
10. T. A. A. Batchelor, J. K. Pedersen, S. H. Winther, I. E. Castelli, K. W. Jacobsen and J. Rossmeisl, *Joule*, 2019, **3**, 834-845.
11. R. B. Wexler, J. M. P. Martirez and A. M. Rappe, *J. Am. Chem. Soc.*, 2018, **140**, 4678-4683.
12. Z. Jia, T. Yang, L. Sun, Y. Zhao, W. Li, J. Luan, F. Lyu, L. C. Zhang, J. J. Kruzic, J. J. Kai, J. C. Huang, J. Lu and C. T. Liu, *Adv. Mater.*, 2020, **32**, e2000385.
13. S. Gao, S. Hao, Z. Huang, Y. Yuan, S. Han, L. Lei, X. Zhang, R. Shahbazian-Yassar and J. Lu, *Nat. Commun.*, 2020, **11**, 2016.
14. H. Li, Y. Han, H. Zhao, W. Qi, D. Zhang, Y. Yu, W. Cai, S. Li, J. Lai, B. Huang and L. Wang, *Nat. Commun.*, 2020, **11**, 5437.
15. D. Zhang, Y. Shi, H. Zhao, W. Qi, X. Chen, T. Zhan, S. Li, B. Yang, M. Sun, J. Lai, B. Huang and L. Wang, *J. Mater. Chem. A*, 2021, **9**, 889-893.
16. D. Wu, K. Kusada, T. Yamamoto, T. Toriyama, S. Matsumura, I. Gueye, O. Seo, J. Kim, S. Hiroi, O. Sakata, S. Kawaguchi, Y. Kubota and H. Kitagawa, *Chem. Sci.*, 2020, **11**, 12731-12736.
17. Z. Jia, K. Nomoto, Q. Wang, C. Kong, L. Sun, L. C. Zhang, S. X. Liang, J. Lu and J. J. Kruzic, *Adv. Funct. Mater.*, 2021, **31**, 2101586.
18. J. Chen, G. Qian, H. Zhang, S. Feng, Y. Mo, L. Luo and S. Yin, *Adv. Funct. Mater.*, 2021, **32**, 2107597.
19. C. Zhang, X. Liang, R. Xu, C. Dai, B. Wu, G. Yu, B. Chen, X. Wang and N. Liu, *Adv. Funct. Mater.*, 2021, **31**, 2008298.
20. Y. Wu, W. Wei, R. Yu, L. Xia, X. Hong, J. Zhu, J. Li, L. Lv, W. Chen, Y. Zhao, L. Zhou and L. Mai, *Adv. Funct. Mater.*, 2022, **32**, 2110910.
21. S. Liu, Y. Shen, Y. Zhang, B. Cui, S. Xi, J. Zhang, L. Xu, S. Zhu, Y. Chen, Y. Deng and W. Hu, *Adv. Mater.*, 2022, **34**, e2106973.
22. Z. Wang, B. Xiao, Z. Lin, Y. Xu, Y. Lin, F. Meng, Q. Zhang, L. Gu, B. Fang, S. Guo and W. Zhong, *Angew. Chem. Int. Ed. Engl.*, 2021, **60**, 23388-23393.
23. S. Li, W. Xie, Y. Song, Y. Li, Y. Song, J. Li and M. Shao, *Chem. Eng. J.*, 2022, **437**, 135473.
24. D. Li, X. Chen, Y. Lv, G. Zhang, Y. Huang, W. Liu, Y. Li, R. Chen, C. Nuckolls and H. Ni, *Appl. Catal. B.*, 2020, **269**, 118824.
25. Y. Zhao, Y. Gao, Z. Chen, Z. Li, T. Ma, Z. Wu and L. Wang, *Appl. Catal. B.*, 2021, **297**, 120395.
26. S. Park, Y.-L. Lee, Y. Yoon, S. Y. Park, S. Yim, W. Song, S. Myung, K.-S. Lee, H. Chang, S. S. Lee and K.-S. An, *Appl. Catal. B.*, 2022, **304**, 120989.
27. J. Chen, M. Qin, S. Ma, R. Fan, X. Zheng, S. Mao, C. Chen and Y. Wang, *Appl. Catal. B.*, 2021, **299**, 120640.
28. Z. Zhang, G. Liu, X. Cui, B. Chen, Y. Zhu, Y. Gong, F. Saleem, S. Xi, Y. Du, A. Borgna, Z. Lai, Q. Zhang, B. Li, Y. Zong, Y. Han, L. Gu and H. Zhang, *Adv. Mater.*, 2018, **30**, e1801741.
29. Y. Yan, R. Zhang, Y. Yu, Z. Sun, R. Che, B. Wei, A. P. LaGrow, Z. Wang and W. Zhou, *Appl. Catal.*

- B., 2021, **291**, 120100.
30. Y. Xie, J. Cai, Y. Wu, Y. Zang, X. Zheng, J. Ye, P. Cui, S. Niu, Y. Liu, J. Zhu, X. Liu, G. Wang and Y. Qian, *Adv. Mater.*, 2019, **31**, e1807780.
  31. Y. Li, W. Pei, J. He, K. Liu, W. Qi, X. Gao, S. Zhou, H. Xie, K. Yin, Y. Gao, J. He, J. Zhao, J. Hu, T.-S. Chan, Z. Li, G. Zhang and M. Liu, *ACS Catal.*, 2019, **9**, 10870-10875.
  32. A. Nairan, C. Liang, S.-W. Chiang, Y. Wu, P. Zou, U. Khan, W. Liu, F. Kang, S. Guo, J. Wu and C. Yang, *Energy Environ.*, 2021, **14**, 1594-1601.
  33. K. L. Zhou, Z. Wang, C. B. Han, X. Ke, C. Wang, Y. Jin, Q. Zhang, J. Liu, H. Wang and H. Yan, *Nat. Commun.*, 2021, **12**, 3783.
  34. P. Wang, K. Jiang, G. Wang, J. Yao and X. Huang, *Angew Chem Int Ed Engl*, 2016, **55**, 12859-12863.
  35. H. Yin, S. Zhao, K. Zhao, A. Muqsit, H. Tang, L. Chang, H. Zhao, Y. Gao and Z. Tang, *Nat. Commun.*, 2015, **6**, 6430.
  36. S. Wang, B. Xu, W. Huo, H. Feng, X. Zhou, F. Fang, Z. Xie, J. K. Shang and J. Jiang, *Appl. Catal. B.*, 2022, **313**, 121472.
